# Supplementary material
Source: Springer Nature journal article supplement (https://www.springermedizin.de/resource/supplementary/13014_2011_533_MOESM2_ESM.pdf/9634054)

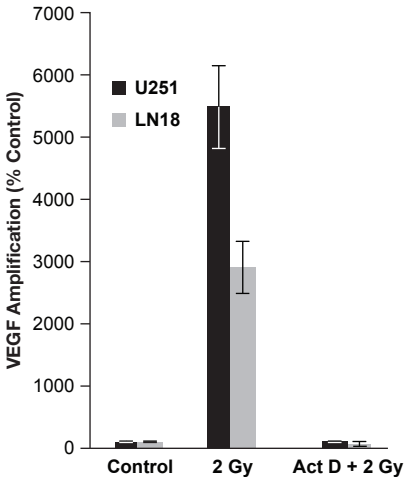

Supplement: MOESM2 [file 9634054]
